# Supplementary material
Source: MDPI journal article supplement (https://www.mdpi.com/2504-3900/8/1/53)
Supplement: s1 [file s1]

# RELATIVE VALIDITY AND REPRODUCIBILITY OF A COMPLEMENTARY FEEDING QUESTIONNAIRE TO ASSESS NUTRIENT INTAKE IN NZ INFANTS

AMY JUDD<sup>1</sup>, KATHRYN BECK<sup>1</sup>, CHRIS MCKINLAY<sup>2</sup>, CATH CONLON<sup>1</sup>

<sup>1</sup>School of Sport, Exercise and Nutrition, Massey University, Auckland, New Zealand

<sup>2</sup>Liggins Institute and Department of Paediatrics: Child and Youth Health, University of Auckland, Auckland, New Zealand

**AIM:** To assess the relative validity and reproducibility of a complementary feeding questionnaire (CFQ) to determine nutrient intakes of New Zealand infants aged 9 to 12 months.

## BACKGROUND

Dietary assessment in infants is challenging but necessary to understand the relationship between diet and growth and development<sup>1</sup>. There are currently no simple, validated dietary assessment tools to determine nutrient intake in New Zealand (NZ) infants.

## METHOD

- Healthy term infants (n=95) aged 10±1 months were recruited
- The primary caregiver completed a complementary feeding questionnaire (CFQ) twice (CFQ-1 and CFQ-2), approx 4 weeks apart (reproducibility).
- A four-day weighed food record (4dWFR) was collected on non-consecutive days between CFQ administrations (validity).
- Validity and reproducibility were assessed for intakes of energy and nutrients using paired t-tests, correlation coefficients, cross-classification and Bland-Altman analysis.

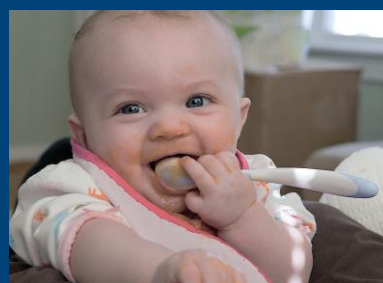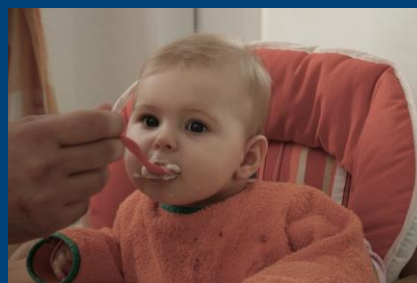

## RESULTS

For validity, most nutrients from the CFQ were comparable to the 4dWFR (range <1-28% difference; Table 1). Correlation coefficients ranged from r=0.18 (saturated fat) to r=0.81 (iron; mean r=0.52). Over half (mean, 54%) of participants were correctly classified by both methods (range 39% to 67%). Between 2% and 15% of participants (mean 7%) were grossly misclassified. Most nutrients showed acceptable agreement between methods (κ=0.20-0.60).

For reproducibility, the CFQ had adequate performance for all nutrients (range 1-14% difference; correlation coefficients range r=0.40 (folate) to r=0.82 (vitamin B<sub>12</sub>; mean r=0.67)). Most participants were correctly classified by both CFQ's (mean 60% correctly classified and 6% grossly misclassified). All nutrients showed acceptable to good agreement between the CFQ-1 and CFQ-2 (range κ=0.25 to κ=0.66).

**Table 1 Validity of the CFQ: difference in mean daily nutrient intakes, correlations, cross-classification by tertiles and weighted kappa based on the 4dWFR and CFQ-1 among infants aged 9 to 12 months (n=95).**

| Nutrients                    | 4dWFR Daily intake <sup>(a)</sup> | CFQ-1 Daily intake <sup>(a)</sup> | Mean difference (%) | Paired t-test (p-value) | Correlation Coefficients <sup>(b)</sup> | Correctly classified (%) | Grossly misclassified (%) | κ   |
|------------------------------|-----------------------------------|-----------------------------------|---------------------|-------------------------|-----------------------------------------|--------------------------|---------------------------|-----|
| Energy (kJ)                  | 3295 ± 810                        | 3306 ± 1047                       | <1                  | 0.92                    | 0.37†                                   | 44.2                     | 10.5                      | 0.3 |
| Protein (g)                  | 26.6 ± 8.8                        | 27.2 ± 10.3                       | -2.2                | 0.55                    | 0.51†                                   | 52.6                     | 5.3                       | 0.4 |
| Fat (g)                      | 33.2 ± 8.7                        | 37.1 ± 13.6                       | -11.8               | <0.01                   | 0.35†                                   | 52.6                     | 10.5                      | 0.3 |
| Saturated fat (g)            | 13.5 ± 4.6                        | 16.3 ± 6.2                        | -20.5               | <0.01                   | 0.18                                    | 43.2                     | 14.7                      | 0.2 |
| CHO (g)                      | 92.7 ± 31.2                       | 83.6 ± 29.6                       | 9.8                 | <0.01                   | 0.41†                                   | 55.8                     | 9.5                       | 0.4 |
| Fibre (g)                    | 9.3 ± 4.5                         | 6.8 ± 3.6                         | 26.6                | <0.01                   | 0.37†                                   | 46.3                     | 9.5                       | 0.3 |
| Vitamin E (mg)               | 4.8 ± 2.2                         | 4.7 ± 2.4                         | <1                  | 0.97                    | 0.47†                                   | 49.5                     | 8.4                       | 0.3 |
| Folate (µg)                  | 137.8 ± 74.7                      | 115.1 ± 54.2                      | 16.5                | <0.01                   | 0.46†                                   | 50.5                     | 12.6                      | 0.3 |
| Potassium (mg)               | 1257 ± 405                        | 1071 ± 434                        | 14.8                | <0.01                   | 0.50†                                   | 45.3                     | 8.4                       | 0.3 |
| Calcium (mg)                 | 478 ± 207                         | 498 ± 246                         | -4.1                | 0.27                    | 0.73†                                   | 65.3                     | 2.1                       | 0.6 |
| Zinc (mg)                    | 4.8 ± 1.9                         | 5.1 ± 2.3                         | -5.8                | 0.13                    | 0.67†                                   | 60.0                     | 4.2                       | 0.5 |
| Selenium (µg)                | 23.8 ± 7.8                        | 22.8 ± 8.1                        | 4.5                 | 0.28                    | 0.27†                                   | 39.0                     | 12.6                      | 0.2 |
| Thiamin (mg)                 | 0.6 [0.6 - 0.7]                   | 0.6 [0.5 - 0.6]                   | 13.1 <sup>∞</sup>   | 0.01                    | 0.69†                                   | 57.9                     | 3.2                       | 0.5 |
| Riboflavin (mg)              | 0.8 [0.7 - 0.9]                   | 0.7 [0.6 - 0.8]                   | 12.9 <sup>∞</sup>   | <0.01                   | 0.70†                                   | 54.7                     | 4.2                       | 0.5 |
| Niacin (mg)                  | 5.5 [5.0 - 6.0]                   | 4.7 [4.3 - 5.2]                   | 15.8 <sup>∞</sup>   | <0.01                   | 0.66†                                   | 57.9                     | 3.2                       | 0.5 |
| Vitamin C (mg)               | 57.3 [51.8 - 63.4]                | 49.7 [44.8 - 55.1]                | 14.3 <sup>∞</sup>   | <0.01                   | 0.54†                                   | 60.0                     | 5.3                       | 0.5 |
| Vitamin B <sub>12</sub> (µg) | 1.0 [0.9 - 1.2]                   | 1.0 [0.8 - 1.1]                   | 6.2 <sup>∞</sup>    | 0.31                    | 0.71†                                   | 61.1                     | 4.2                       | 0.5 |
| Iodine (µg)                  | 41.9 [37.4 - 46.9]                | 39.5 [34.5 - 45.3]                | 5.8 <sup>∞</sup>    | 0.20                    | 0.76†                                   | 60.0                     | 4.2                       | 0.5 |
| Iron (mg)                    | 4.6 [4.0 - 5.2]                   | 4.3 [3.8 - 5.0]                   | 5.4 <sup>∞</sup>    | 0.21                    | 0.81†                                   | 67.4                     | 2.1                       | 0.6 |

4dWFR, four-day weighed food record; CFQ-1, First complementary feeding questionnaire; CHO, carbohydrate; κ, weighted kappa statistic. <sup>(a)</sup> mean ± SD or geometric mean [95% CI]; <sup>(b)</sup> Pearson's Correlation Coefficients; †p<0.01, significant difference (2-tailed); <sup>∞</sup>Symmetric mean percent difference. <sup>Note:</sup> Participants were in tertiles, 2 groups of 32 and 1 group of 31 participants

## CONCLUSION

The CFQ appears to have acceptable relative validity and good reproducibility for assessing nutrient intake in infants aged 9 to 12 months.

The CFQ could be used in future research to investigate infant nutrient intakes, where using a simple tool with little participant burden is beneficial.

## REFERENCES

<sup>1</sup> Cade, J., Thompson, R., Burley, V., & Warm, D. (2002). Development, validation and utilisation of food-frequency questionnaires - a review. *Public Health Nutrition*, 5(4), 567-587. doi:10.1079/phn2001318
